# Supplementary material for: Molecular beam scattering of neon from flat jets of cold salty water
Source: Royal Society of Chemistry journal article supplement (doi:10.1039/d5sc01636c), 2025-01-01

**(a)**  $\theta_i = 45^\circ$

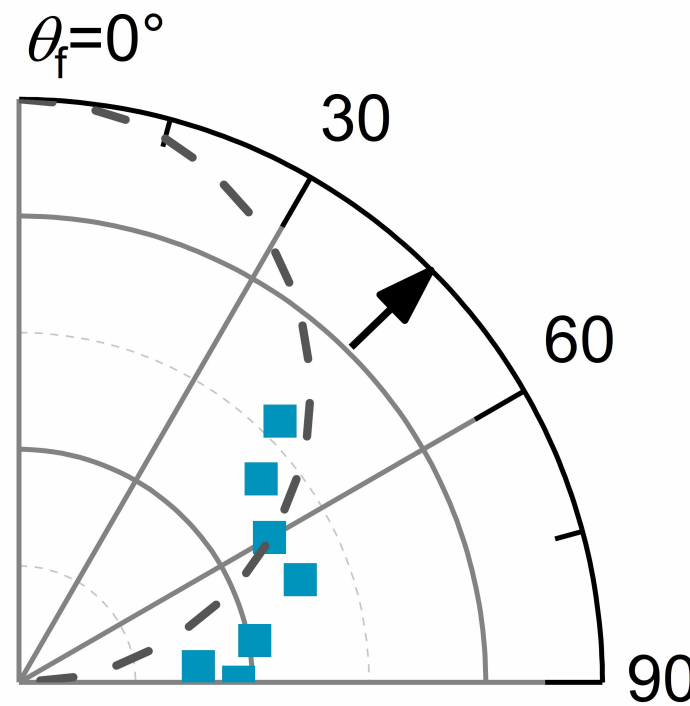

**(b)**  $\theta_i = 60^\circ$

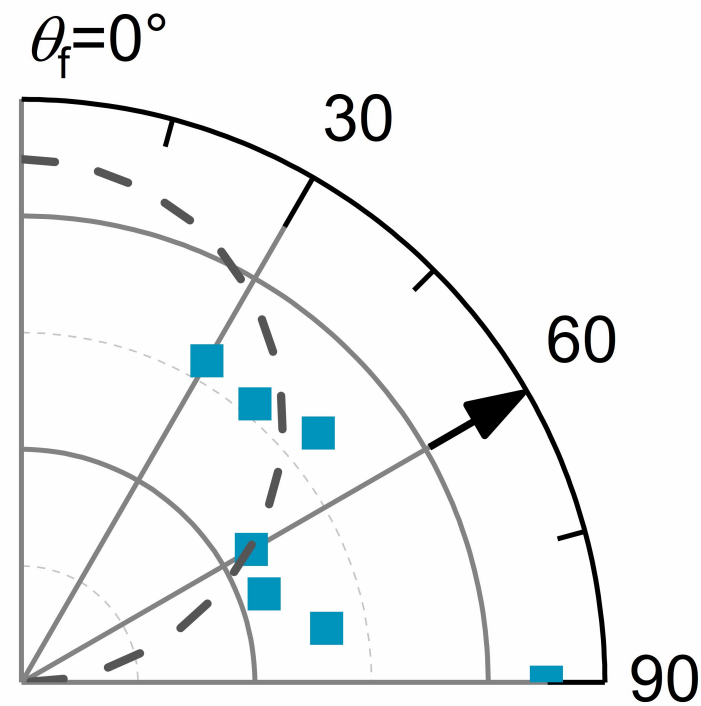

**(c)**  $\theta_i = 75^\circ$

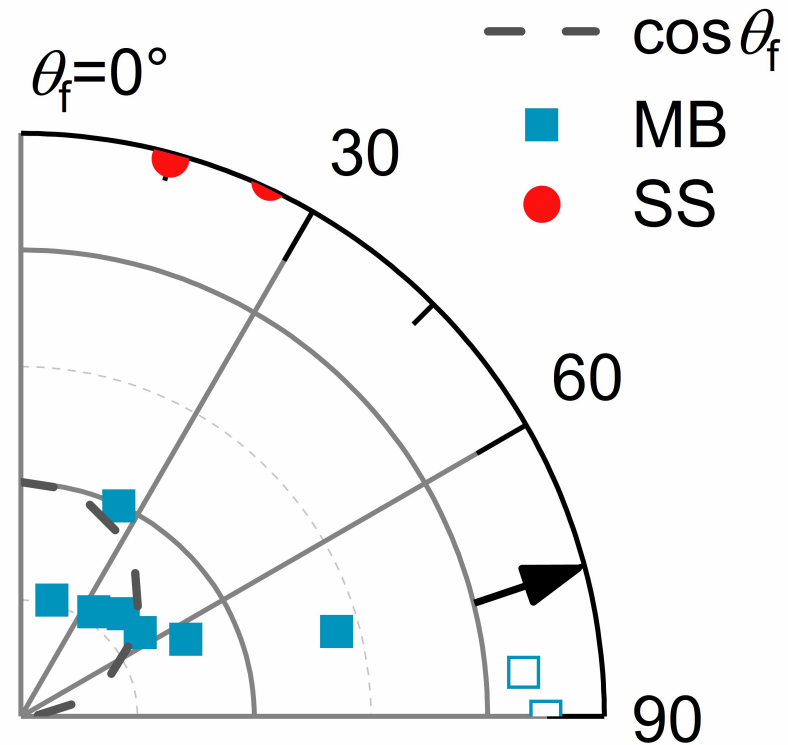

Supplement: d5sc01636c3.pdf [file d5sc01636c3.pdf]
