# Supplementary material for: Molecular beam scattering of neon from flat jets of cold salty water
Source: Royal Society of Chemistry journal article supplement (doi:10.1039/d5sc01636c), 2025-01-01

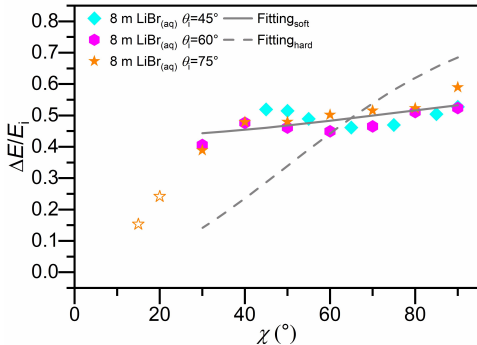

Supplement: d5sc01636c4.pdf [file d5sc01636c4.pdf]
